# Supplementary material for: Identification and Characterization of Human Observational Studies in Nutritional Epidemiology on Gut Microbiomics for Joint Data Analysis
Source: MDPI journal article supplement (doi:10.3390/nu13093292), 2021-09-21
Supplement: s1 [file s1]

# Supplement Material

## Identification and Characterization of Human Observational Studies in Nutritional Epidemiology on Gut Microbiomics for Joint Data Analysis

Mariona Pinart <sup>1</sup>, Katharina Nimptsch <sup>1\*</sup>, Sofia K. Forslund <sup>2,3,4,5,6,7</sup>, Kristina Schlicht <sup>8</sup>, Miguel Gueimonde <sup>9,10</sup>, Patrizia Brigidi <sup>11</sup>, Silvia Turroni <sup>12</sup>, Wolfgang Ahrens <sup>13,14</sup>, Antje Hebestreit <sup>13</sup>, Maike Wolters <sup>13</sup>, Andreas Dötsch <sup>15</sup>, Ute Nöthlings <sup>16</sup>, Kolade Oluwagbemigun <sup>16</sup>, Rafael R. C. Cuadrat<sup>17</sup>, Matthias B. Schulze <sup>17,18,19</sup>, Marie Standl <sup>20</sup>, Michael Schloter <sup>21</sup>, Maria De Angelis <sup>22</sup>, Patricia Iozzo <sup>23</sup>, Maria Angela Guzzardi <sup>23</sup>, Geertrui Vlaemynck <sup>24</sup>, John Penders <sup>25</sup>, Daisy MAE Jonkers <sup>26</sup>, Maya Stemmer <sup>27</sup>, Giulia Chiesa <sup>28</sup>, Duccio Cavalieri <sup>29</sup>, Carlotta De Filippo<sup>30</sup>, Danilo Ercolini <sup>31,32</sup>, Francesca De Filippis <sup>31,32</sup>, David Ribet <sup>33</sup>, Najate Achamrah <sup>33,34</sup>, Marie-Pierre Tavolacci <sup>33,35</sup>, Pierre Déchelotte <sup>33,34</sup>, Jildau Bouwman <sup>36</sup>, Matthias Laudes <sup>8</sup>, and Tobias Pischon <sup>1,3,5,37,38</sup>

<sup>1</sup> Molecular Epidemiology Research Group, Max Delbrück Center for Molecular Medicine in the Helmholtz Association (MDC), 13125 Berlin, Germany

<sup>2</sup> Experimental and Clinical Research Center, A Cooperation of Charité-Universitätsmedizin Berlin and Max Delbrück Center for Molecular Medicine, Lindenberger Weg 80, 13125 Berlin, Germany

<sup>3</sup> Charité-Universitätsmedizin Berlin, Corporate Member of Freie Universität Berlin, Humboldt-Universität zu Berlin, and Berlin Institute of Health, 10117 Berlin, Germany

<sup>4</sup> Max Delbrück Center for Molecular Medicine in the Helmholtz Association, 13125 Berlin, Germany

<sup>5</sup> German Centre for Cardiovascular Research (DZHK), Partner Site Berlin, 10785 Berlin, Germany

<sup>6</sup> Berlin Institute of Health (BIH), 10178 Berlin, Germany

<sup>7</sup> Structural and Computational Biology Unit, European Molecular Biology Laboratory, 69117 Heidelberg, Germany

<sup>8</sup> Institute of Diabetes and Clinical Metabolic Research, University of Kiel, 24105 Kiel, Germany

<sup>9</sup> Department of Microbiology and Biochemistry of Dairy Products, IPLA-CSIC, 33300 Villaviciosa, Spain; mgueimonde@ipla.csic.es

<sup>10</sup> Diet, Microbiota and Health Group, Instituto de Investigación Sanitaria del Principado de Asturias (ISPA), 33011 Oviedo, Spain

<sup>11</sup> Department of Medical and Surgical Sciences, University of Bologna, Via Massarenti 9, 40138 Bologna, Italy

<sup>12</sup> Department of Pharmacy and Biotechnology, University of Bologna, Via Belmeloro 6, 40126 Bologna, Italy

<sup>13</sup> Leibniz Institute for Prevention Research and Epidemiology-BIPS, 28359 Bremen, Germany

<sup>14</sup> Institute of Statistics, Bremen University, 28359 Bremen, Germany

<sup>15</sup> Department of Physiology and Biochemistry of Nutrition, Max Rubner-Institut (MRI)—Federal Research Institute of Nutrition and Food, 76131 Karlsruhe, Germany

<sup>16</sup> Department of Epidemiology, Institute of Nutrition and Food Sciences, University of Bonn, 53115 Bonn, Germany

<sup>17</sup> Department of Molecular Epidemiology, German Institute of Human Nutrition Potsdam-Rehbruecke, 14558 Nuthetal, Germany

<sup>18</sup> Institute of Nutritional Science, University of Potsdam, 14558 Potsdam, Germany

<sup>19</sup> German Center for Diabetes Research (DZD), 85764 München-Neuherberg, Germany

<sup>20</sup> Institute of Epidemiology, Helmholtz Zentrum München—German Research Center for Environmental Health, 85764 Neuherberg, Germany

<sup>21</sup> Research Unit for Comparative Microbiome Analysis, Helmholtz Zentrum München—German Research Center for Environmental Health, 85764 Neuherberg, Germany

<sup>22</sup> Department of Soil, Plant and Food Sciences, University of Bari Aldo Moro, 70126 Bari, Italy

<sup>23</sup> Institute of Clinical Physiology, National Research Council, via Moruzzi 1, 56124 Pisa, Italy

<sup>24</sup> Department Technology and Food, Flanders Research Institute for Agriculture, Fisheries and Food, 9090 Melle, Belgium

<sup>25</sup> Department of Medical Microbiology, NUTRIM School of Nutrition and Translational Research in Metabolism and Care and Public Health Research Institute (CAPHRI), Maastricht University Medical Center+, P.O.B. 616 6200 Maastricht, The Netherlands

<sup>26</sup> Department of Internal Medicine, Division Gastroenterology-Hepatology, NUTRIM School of Nutrition and Translational Research in Metabolism, Maastricht University Medical Center+, P.O.B. 616 6200 Maastricht, The Netherlands

<sup>27</sup> Department of Industrial Engineering and Management, Ben-Gurion University of the Negev, P.O.B. 653 Beer-Sheva, Israel

<sup>28</sup> Department of Pharmacological and Biomolecular Sciences, Università degli Studi di Milano, 20133 Milan, Italy

<sup>29</sup> Department of Biology, University of Florence, Via Madonna del Piano 6, 50019 Sesto Fiorentino, Florence, Italy

<sup>30</sup> Institute of Agricultural Biology and Biotechnology National Research Council Via Moruzzi, 1, 56124 Pisa, Italy

<sup>31</sup> Department of Agricultural Sciences, University of Naples Federico II, 80055 Portici, Italy

<sup>32</sup> Task Force On Microbiome Studies, University of Naples Federico II, 80134 Naples, Italy

<sup>33</sup> INSERM UMR 1073 “Nutrition, Inflammation and Gut-brain axis dysfunctions”, UNIROUEN, Normandie University, 76000 Rouen, France

<sup>34</sup> Department of Nutrition, CHU Rouen, 76000 Rouen, France

<sup>35</sup> INSERM CIC-CRB 1404, CHU Rouen, 76000 Rouen, France

<sup>36</sup> Microbiology and Systems Biology Group, TNO, Utrechtseweg 48, 3704HE Zeist, The Netherlands

<sup>37</sup> Biobank Technology Platform, Max Delbrück Center for Molecular Medicine in the Helmholtz Association (MDC), 13125 Berlin, Germany

<sup>38</sup> Biobank Core Facility, Berlin Institute of Health at Charité—Universitätsmedizin Berlin, 10178 Berlin, Germany

**Corresponding author:**

Katharina Nimptsch; E-Mail: Katharina.Nimptsch@mdc-berlin.de; Tel.: +49 30 9046 4573

**Supplement Table S1.** Description of other measurements assessed in the observational studies participating in KP-INTIMIC.

| Study                                                                                    | Country       | Alcohol<br>consumption | Tobacco<br>consumption | PA <sup>1</sup> |                | Sedentary<br>behaviour | Anthropometry  |                | SES <sup>4</sup> | Medication | Health<br>status |
|------------------------------------------------------------------------------------------|---------------|------------------------|------------------------|-----------------|----------------|------------------------|----------------|----------------|------------------|------------|------------------|
|                                                                                          |               |                        |                        | Q <sup>2</sup>  | M <sup>3</sup> |                        | Q <sup>2</sup> | M <sup>3</sup> |                  |            |                  |
| DONALD study                                                                             | Germany       | ✓                      | ✓                      | ✓               | —              | —                      | —              | ✓              | ✓                | ✓          | ✓                |
| EPIC-Potsdam                                                                             | Germany       | ✓                      | ✓                      | ✓               | ✓              | ✓                      | —              | ✓              | ✓                | ✓          | ✓                |
| LISA                                                                                     | Germany       | ✓                      | ✓                      | ✓               | —              | ✓                      | ✓              | ✓              | ✓                | ✓          | ✓                |
| NAKO                                                                                     | Germany       | ✓                      | ✓                      | ✓               | ✓              | —                      | —              | ✓              | ✓                | ✓          | ✓                |
| Diet4MicroGut                                                                            | Italy         | ✓                      | ✓                      | —               | —              | ✓                      | ✓              | —              | ✓                | ✓          | ✓                |
| DORIAN-PISAC                                                                             | Italy         | ✓                      | ✓                      | ✓               | —              | —                      | —              | ✓              | ✓                | ✓          | ✓                |
| Infant microbiome studies                                                                | Italy         | —                      | —                      | —               | —              | —                      | —              | ✓ <sup>5</sup> | ✓ <sup>5</sup>   | ✓          | ✓                |
| Italian Elderly Cohort                                                                   | Italy         | ✓                      | —                      | ✓               | —              | ✓                      | —              | ✓              | ✓ <sup>5</sup>   | ✓          | ✓                |
| Octopus                                                                                  | Italy         | ✓                      | ✓                      | ✓               | —              | ✓                      | —              | ✓              | ✓                | ✓          | ✓                |
| IDEFICS/ I.Family cohort                                                                 | Multinational | ✓                      | ✓                      | ✓               | ✓              | ✓                      | —              | ✓              | ✓                | ✓          | ✓                |
| TransMic                                                                                 | Multinational | ✓                      | ✓                      | ✓               | —              | ✓                      | ✓              | ✓              | ✓                | ✓          | ✓                |
| LucKI Gut Study                                                                          | Netherlands   | ✓                      | ✓                      | ✓               | —              | —                      | ✓              | ✓              | ✓                | ✓          | ✓                |
| EarlyMicroHealth                                                                         | Spain         | —                      | —                      | —               | —              | —                      | —              | ✓              | ✓                | ✓          | ✓                |
| ErNst                                                                                    | Germany       | ✓                      | ✓                      | —               | ✓              | —                      | —              | ✓              | ✓                | ✓          | ✓                |
| Elderly microbiome studies                                                               | Italy         | ✓ <sup>5</sup>         | ✓ <sup>5</sup>         | ✓ <sup>5</sup>  | —              | ✓ <sup>5</sup>         | —              | ✓ <sup>5</sup> | ✓ <sup>5</sup>   | ✓          | ✓                |
| DIMISA                                                                                   | Spain         | ✓                      | ✓                      | ✓               | —              | ✓                      | —              | ✓              | ✓                | ✓          | ✓                |
| EDILS                                                                                    | France        | ✓                      | ✓                      | —               | —              | —                      | —              | ✓              | ✓                | ✓          | ✓                |
| Medika Study                                                                             | Italy         | —                      | —                      | —               | —              | —                      | —              | ✓              | ✓                | ✓          | ✓                |
| IBD South Limburg Cohort                                                                 | Netherlands   | ✓ <sup>5</sup>         | ✓                      | —               | —              | —                      | —              | ✓ <sup>5</sup> | —                | ✓          | ✓                |
| Maastricht IBS Study                                                                     | Netherlands   | ✓                      | ✓                      | —               | —              | —                      | ✓              | —              | ✓                | ✓          | ✓                |
| Effect of fibers on gut microbiota and SCFA in Parkinson patients and healthy references | Belgium       | —                      | —                      | —               | —              | —                      | ✓              | —              | ✓                | ✓          | ✓                |
| FoCus                                                                                    | Germany       | ✓                      | ✓                      | ✓               | —              | ✓                      | ✓              | ✓              | ✓                | ✓          | ✓                |
| MetaCardis                                                                               | Multinational | ✓                      | ✓                      | ✓               | —              | ✓                      | —              | ✓              | ✓                | ✓          | ✓                |

<sup>1</sup> PA: physical activity; <sup>2</sup> Q: questionnaire-based; <sup>3</sup> M: measured (objective measurement); <sup>4</sup> SES: socioeconomic status; <sup>5</sup> data available in a subset of participants.

**Supplement Table S2.** Description of biomarkers and metabolome assessed in the observational studies participating in KP-INTIMIC.

| Study                                                                                    | Country       | Blood lipids | Glucose/Insulin | Inflammatory markers | Adiposity markers | Metabolome                |
|------------------------------------------------------------------------------------------|---------------|--------------|-----------------|----------------------|-------------------|---------------------------|
| DONALD study                                                                             | Germany       | √            | √               | √                    | √                 | √<br>(urine/plasma)       |
| EPIC-Potsdam                                                                             | Germany       | √            | √               | √                    | √                 | —                         |
| LISA                                                                                     | Germany       | √            | √               | √                    | √                 | √<br>(serum)              |
| NAKO                                                                                     | Germany       | √            | √               | —                    | —                 | —                         |
| Diet4MicroGut                                                                            | Italy         | —            | —               | —                    | —                 | √<br>(urine/stool)        |
| DORIAN-PISAC                                                                             | Italy         | √            | √               | √                    | √                 | √<br>(urine/stool)        |
| Infant microbiome studies                                                                | Italy         | —            | —               | —                    | —                 | —                         |
| Italian Elderly Cohort                                                                   | Italy         | √            | √               | √                    | √                 | √<br>(serum)              |
| Octopus                                                                                  | Italy         | √            | √               | √                    | —                 | √<br>(plasma/stool)       |
| IDEFICS/ I.Family cohort                                                                 | Multinational | √            | √               | √                    | √                 | √<br>(urine/serum/stool)) |
| TransMic                                                                                 | Multinational | √            | √               | √                    | —                 | √<br>(stool)              |
| LucKI Gut Study                                                                          | Netherlands   | —            | —               | —                    | —                 | —                         |
| EarlyMicroHealth                                                                         | Spain         | —            | —               | —                    | —                 | √<br>(stool)              |
| ErNst                                                                                    | Germany       | —            | —               | —                    | —                 | —                         |
| Elderly microbiome studies                                                               | Italy         | —            | —               | √                    | —                 | √<br>(urine/serum)        |
| DIMISA                                                                                   | Spain         | √            | √               | √                    | √                 | —                         |
| EDILS                                                                                    | France        | √            | √               | √                    | √                 | —                         |
| Medika Study                                                                             | Italy         | √            | √               | √                    | —                 | √<br>(urine)              |
| IBD South Limburg Cohort                                                                 | Netherlands   | —            | —               | √                    | —                 | —                         |
| Maastricht IBS Study                                                                     | Netherlands   | —            | —               | √                    | —                 | √<br>(stool)              |
| Effect of fibers on gut microbiota and SCFA in Parkinson patients and healthy references | Belgium       | —            | —               | —                    | —                 | √<br>(stool)              |
| FoCus                                                                                    | Germany       | √            | √               | √                    | √                 | √<br>(urine/serum)        |
| MetaCardis                                                                               | Multinational | √            | √               | √                    | √                 | √<br>(urine/serum)        |

**Supplement Table S3.** Availability of observational studies to store and share data.

| Study                         | International/<br>National/<br>Regional | EC approval | IC<br>provided | Agreed to store and share raw data                           |                                                                                                   | Willing to store and<br>share metadata for<br>federated joint<br>analysis                          |
|-------------------------------|-----------------------------------------|-------------|----------------|--------------------------------------------------------------|---------------------------------------------------------------------------------------------------|----------------------------------------------------------------------------------------------------|
|                               |                                         |             |                | within<br>INTIMIC                                            | Other projects                                                                                    |                                                                                                    |
| DONALD study                  | Germany                                 | Yes         | Yes            | Yes                                                          | Yes, with<br>permission from<br>PI <sup>1</sup>                                                   | Yes, with permission<br>from PI <sup>1</sup>                                                       |
| EPIC-Potsdam                  | Germany                                 | Yes         | Yes            | No                                                           | No                                                                                                | Yes                                                                                                |
| LISA                          | Germany                                 | Yes         | Yes            | No                                                           | requires<br>cooperation<br>contract and<br>MDTA <sup>2</sup> and<br>approval from SC <sup>3</sup> | requires cooperation<br>contract and MDTA <sup>2</sup><br>and approval from SC <sup>3</sup>        |
| NAKO                          | Germany                                 | Yes         | Yes            | Requires<br>approval from<br>the NAKO eV                     | Requires approval<br>from the NAKO<br>eV                                                          | Requires approval<br>from the NAKO eV                                                              |
| Diet4MicroGut                 | Italy                                   | Yes         | Yes            | Yes                                                          | Yes                                                                                               | Yes                                                                                                |
| DORIAN-PISAC                  | Italy                                   | Yes         | Yes            | No                                                           | depends on kind<br>of data,<br>permission of<br>scientists<br>involved, and<br>anonymized         | depends on kind of<br>data, permission of<br>scientists involved,<br>and anonymized                |
| Infant microbiome<br>studies  | Italy                                   | Yes         | Yes            | Yes<br>(microbiome<br>data)                                  | Yes (microbiome<br>data)                                                                          | Yes, after obtaining<br>consent of the partners<br>involved in the<br>nutritional/health<br>topics |
| Italian Elderly<br>Cohort     | Italy                                   | Yes         | Yes            | Yes<br>(microbiome<br>data)                                  | Yes (microbiome<br>data)                                                                          | Yes, after obtaining<br>consent of the partners<br>involved in the<br>nutritional/health<br>topics |
| Octopus                       | Italy                                   | Yes         | Yes            | with<br>permission<br>from Octopus<br>consortium             | with permission<br>from Octopus<br>consortium                                                     | with permission from<br>Octopus consortium                                                         |
| IDEFICS/ I.Family<br>cohort   | Germany                                 | Yes         | Yes            | Yes, after<br>obtaining<br>consent of the<br>PI <sup>1</sup> | Yes, after<br>obtaining consent<br>of the PI <sup>1</sup>                                         | Yes, after obtaining<br>consent of the PI <sup>1</sup>                                             |
| TransMic                      | Multinational                           | Yes         | Yes            | Not yet                                                      | No                                                                                                | with permission from<br>TransMic consortium                                                        |
| LuckI Gut Study               | Netherlands                             | Yes         | Yes            | No                                                           | Yes, with<br>permission from<br>SC <sup>3</sup> , anonymized<br>and with MDTA <sup>2</sup>        | Yes, with permission<br>from SC <sup>3</sup> , anonymized<br>and with MDTA <sup>2</sup>            |
| EarlyMicroHealth              | Spain                                   | Yes         | Yes            | Yes                                                          | Yes                                                                                               | Yes                                                                                                |
| ErNst                         | Germany                                 | Yes         | Yes            | Yes                                                          | Yes                                                                                               | Yes                                                                                                |
| Elderly microbiome<br>studies | Italy                                   | Yes         | Yes            | Yes<br>(microbiome<br>data)                                  | Yes (microbiome<br>data)                                                                          | Yes, after obtaining<br>consent of the partners<br>involved in the<br>nutritional/health<br>topics |
| DIMISA                        | Spain                                   | Yes         | Yes            | Yes                                                          | Yes                                                                                               | Yes                                                                                                |
| EDILS                         | France                                  | Yes         | Yes            | No                                                           | Yes, with<br>permission                                                                           | Yes if anonymized                                                                                  |
| Medika Study                  | Italy                                   | Yes         | Yes            | Yes                                                          | Yes                                                                                               | Yes                                                                                                |
| IBD South Limburg<br>Cohort   | Netherlands                             | Yes         | Yes            | No                                                           | Yes, with<br>permission from<br>SC <sup>3</sup> , anonymized<br>and with MDTA <sup>2</sup>        | Yes, with permission<br>from SC <sup>3</sup> , anonymized<br>and with MDTA <sup>2</sup>            |

|                                                                                          |               |     |     |    |                                                                                   |                                                                                   |
|------------------------------------------------------------------------------------------|---------------|-----|-----|----|-----------------------------------------------------------------------------------|-----------------------------------------------------------------------------------|
| Maastricht IBS Study                                                                     | Netherlands   | Yes | Yes | No | Yes, with permission from SC <sup>3</sup> , anonymized and with MDTA <sup>2</sup> | Yes, with permission from SC <sup>3</sup> , anonymized and with MDTA <sup>2</sup> |
| Effect of fibers on gut microbiota and SCFA in Parkinson patients and healthy references | Belgium       | Yes | Yes | No | No                                                                                | No                                                                                |
| FoCus                                                                                    | Germany       | Yes | Yes | No | Yes, with permission from P2N biobank and anonymized                              | Yes, with permission from P2N biobank and anonymized                              |
| MetaCardis                                                                               | Multinational | Yes | Yes | No | with permission from SC <sup>3</sup> and anonymized                               | Yes, with permission from SC <sup>3</sup> and anonymized                          |

<sup>1</sup>PI: Principal Investigator; <sup>2</sup>MDTA: Material and data Transfer agreement; <sup>3</sup>SC: Steering Committee
